# Supplementary material for: The new supra molecular nano-aggregate curcumin-cucurbit[7]uril: synthesis, photophysical properties and biocompatibility evaluation
Source: Royal Society of Chemistry journal article supplement (doi:10.1039/c6pp00408c), 2017-02-14
Supplement: c6pp00408c1.pdf [file c6pp00408c1.pdf]

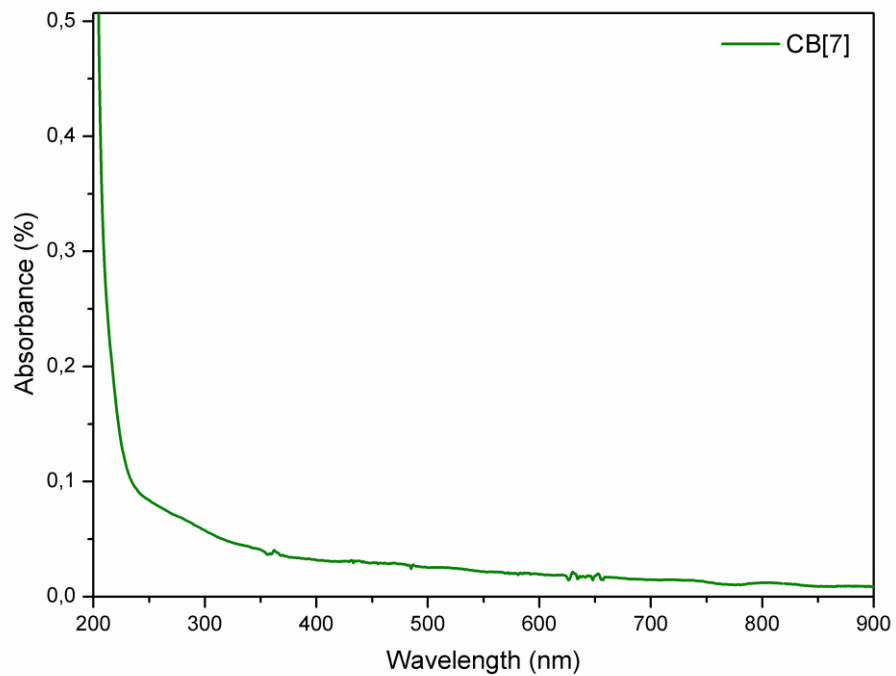

**Figure S2.** Absorption spectra of CB[7] in PBS solution (pH= 7.2).

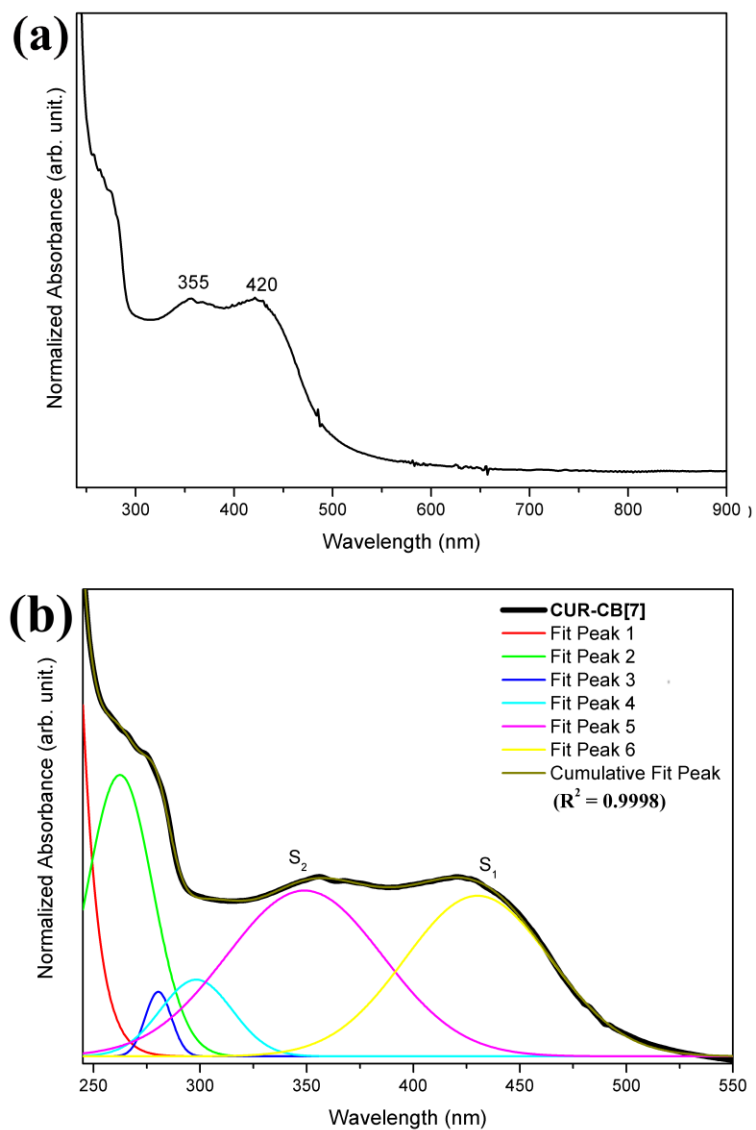

**Figure S3.** Absorption (a) and deconvoluted absorption (b) spectra of CUR-CB[7] in PBS solution (pH= 7.2).

**Table S1:** maximum absorption wavelength of deconvoluted peak of the CUR and CUR-CB[7]

| Fit Peak | CUR ( $\lambda_{\text{max}}/\text{nm}$ ) | CUR-Cb[7] ( $\lambda_{\text{max}}/\text{nm}$ ) |
|----------|------------------------------------------|------------------------------------------------|
| 1        | 261                                      | -                                              |
| 2        | 304                                      | 262                                            |
| 3        | 380                                      | 280                                            |
| 4        | 415                                      | 298                                            |
| 5        | 418                                      | 349                                            |
| 6        | 446                                      | 430                                            |

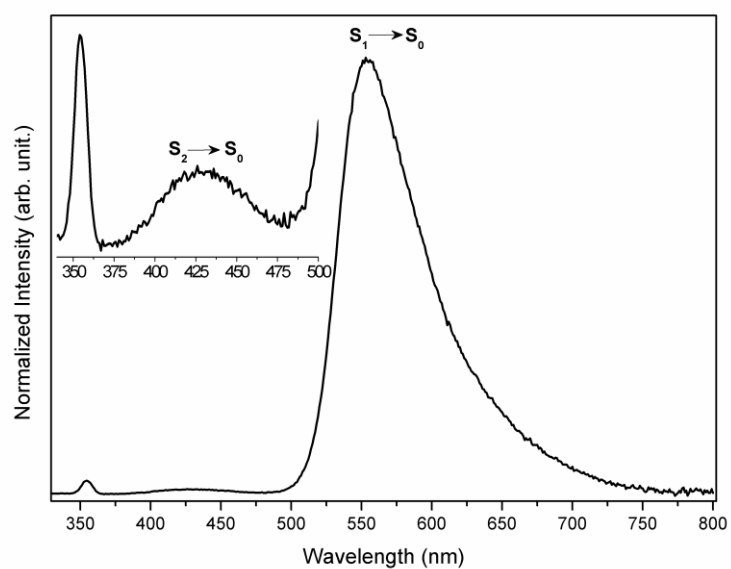

Figure S4: Emission spectrum of CUR in PBS solution with excitation at 318 nm.

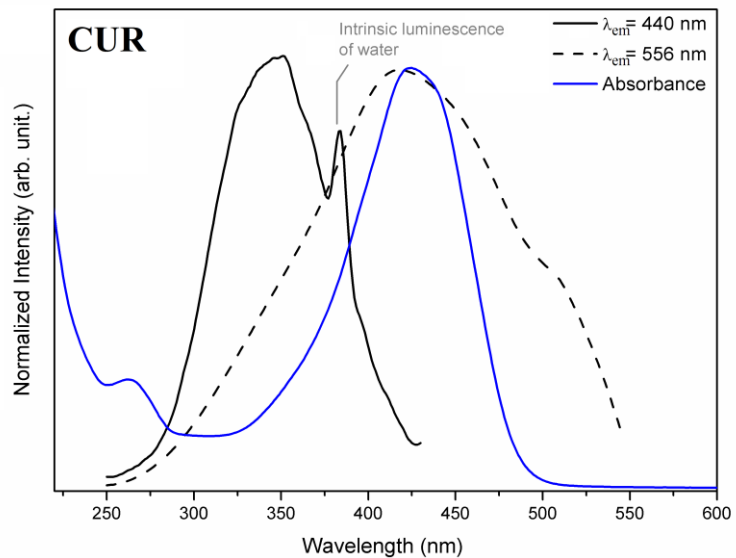

**Figure S5.** Excitation (black line) and Absorption (blue line) spectra of CUR.

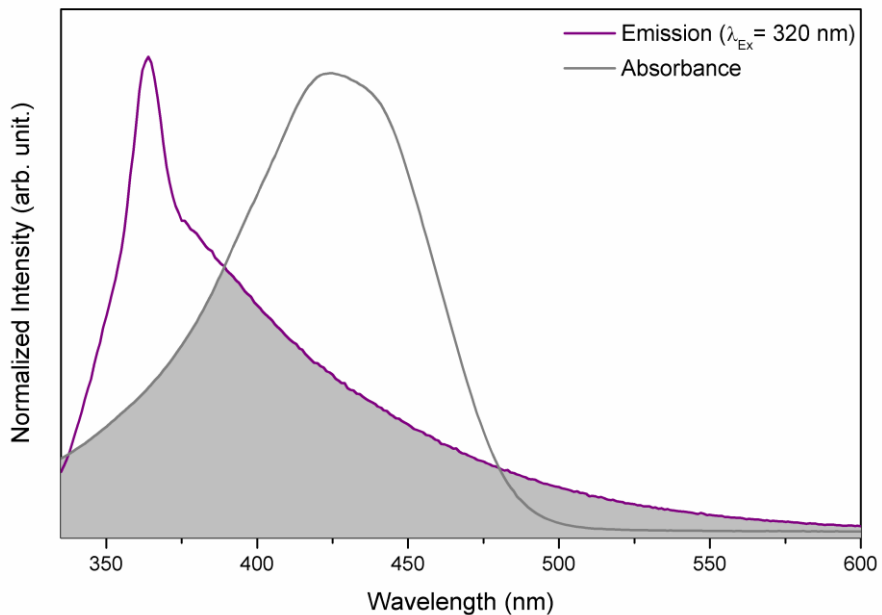

**Figure S6.** Emission (violet line) and absorption (grey line) spectra of CB[7] and CUR, respectively.

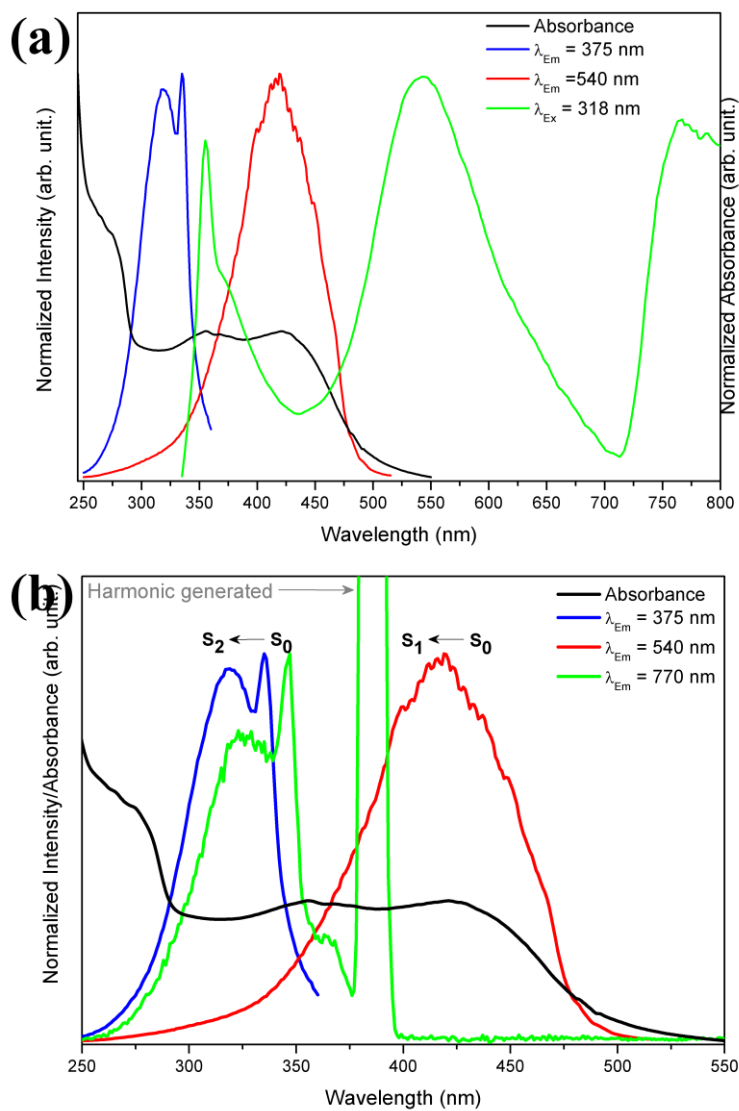

**Figure S7.** Excitation, absorption and emission spectra of CUR-CB[7].

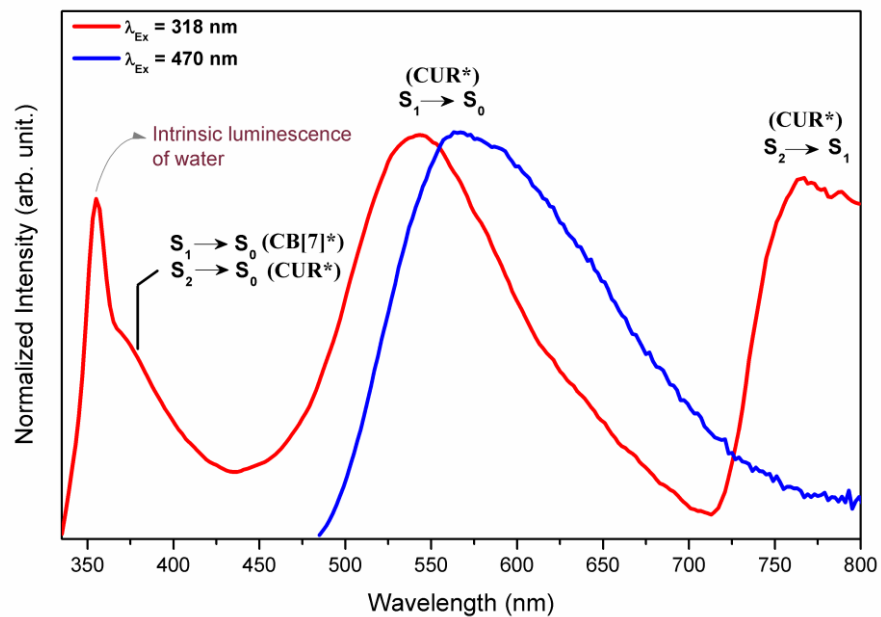

**Figure S8.** Emission spectra of CUR-CB[7] in BPS solution (pH = 7.2).

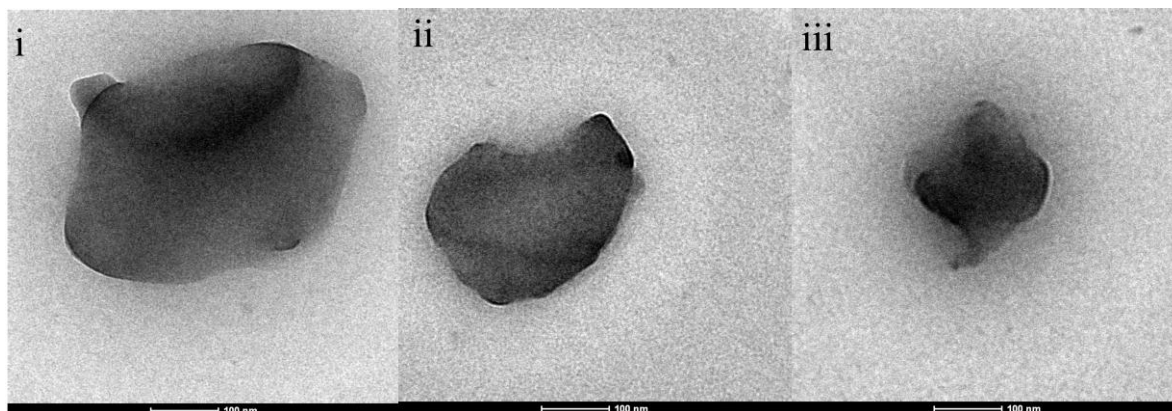

**Figure S9.** TEM image of supramolecular aggregate CUR-CB[7].
